# Supplementary material
Source: HighWire-hosted journal article supplement (https://bmjopen.bmj.com/content/12/9/e066197)
Supplement: inline-supplementary-material-2 [file inline-supplementary-material-2.pdf]

## External validation of the ProVent score for prognostication of 1-year mortality of critically ill patients with prolonged mechanical ventilation: a retrospective observational study

**Additional File 2:** Regression coefficients of the original ProVent probability model, the recalibrated model and the extended model.

| Term                      | Original model | Recalibrated model | Extended Model |
|---------------------------|----------------|--------------------|----------------|
|                           | $\beta$        | $\beta$            | $\beta$        |
| Intercept                 | -1.7401        | -1.7580            | -0.7860        |
| Age                       | 0.0435         | 0.0435             | 0.0435         |
| Platelet count            | -0.0036        | -0.0036            | -0.0036        |
| Pressor                   | 1.0835         | 0.6572             | 0.6572         |
| Renal replacement therapy | 0.9250         | 0.1142             | 0.1142         |
| Total Bilirubin           |                |                    | 0.1248         |
| Any Surgery               |                |                    | -0.5701        |
| Enteral Nutrition         |                |                    | -0.9366        |
